# Supplementary material for: Internalization and trafficking of CSPG-bound recombinant VAR2CSA lectins in cancer cells
Source: PubMed Central journal article supplement (PMC8866492; doi:10.1038/s41598-022-07025-6), 2022-02-23

Figure 1b

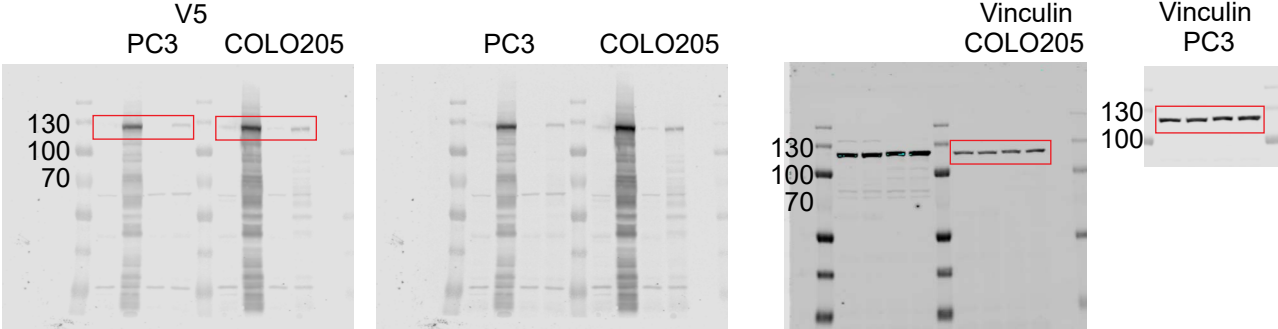

Figure 1f

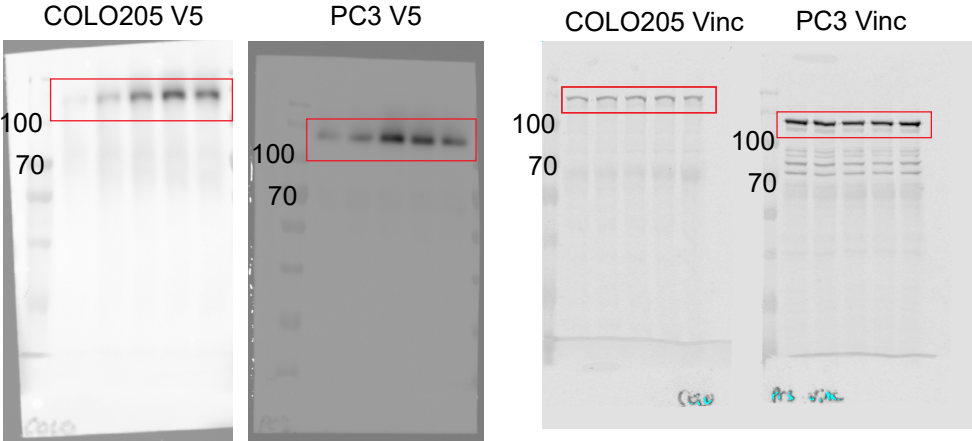

Figure 2c

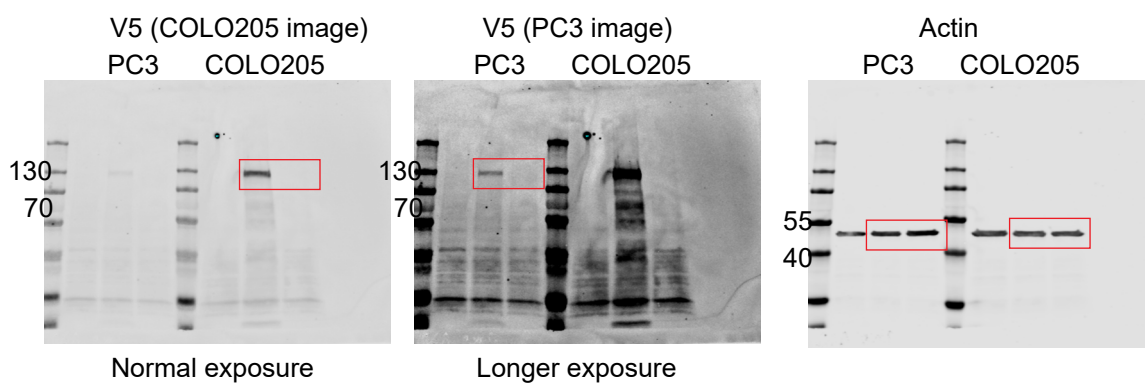

Figure 2e

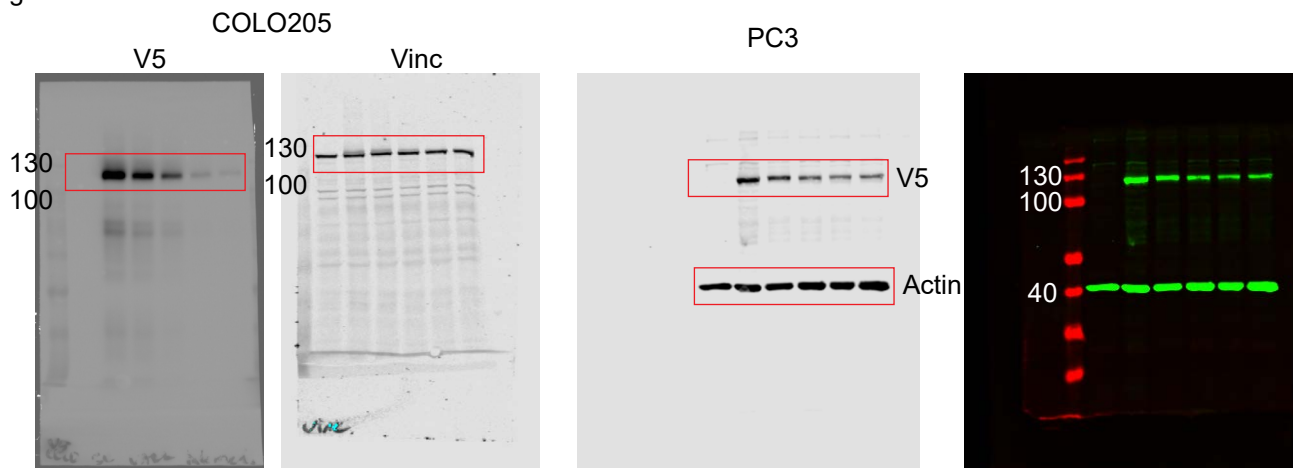

Figure 2i

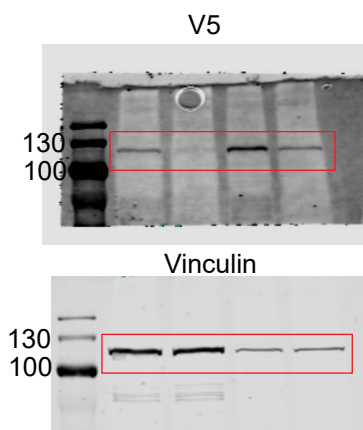

Figure 3a

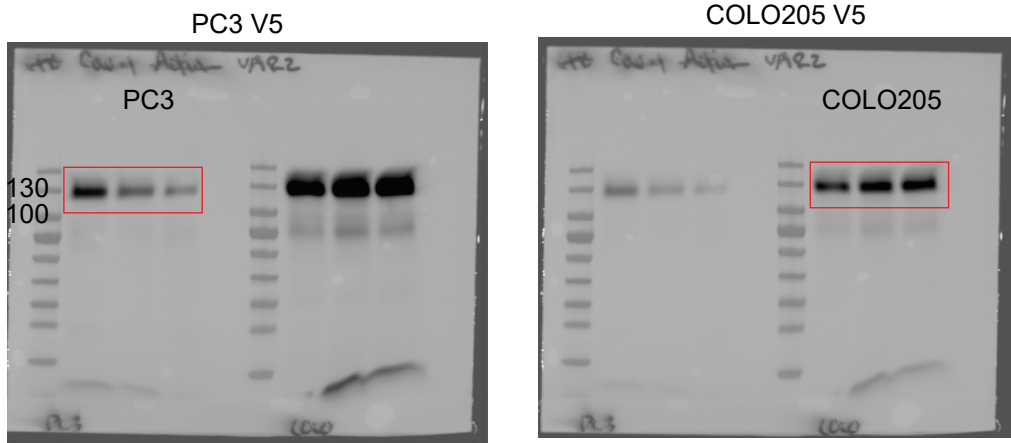

CHC

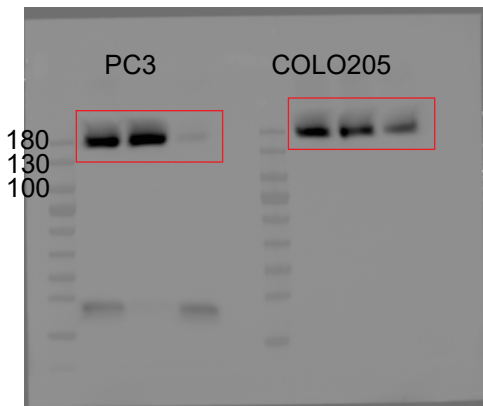

Cav-1

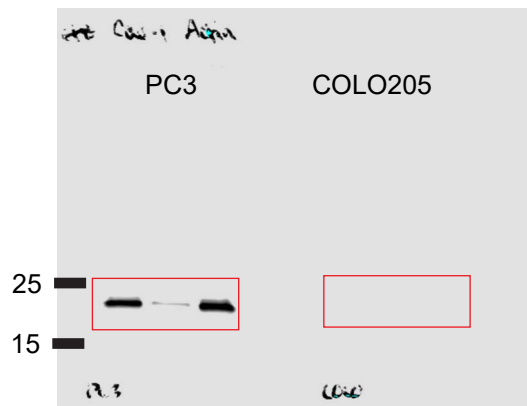

Actin

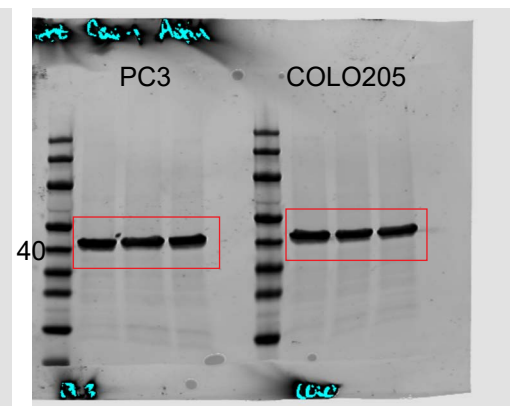

Figure 4c

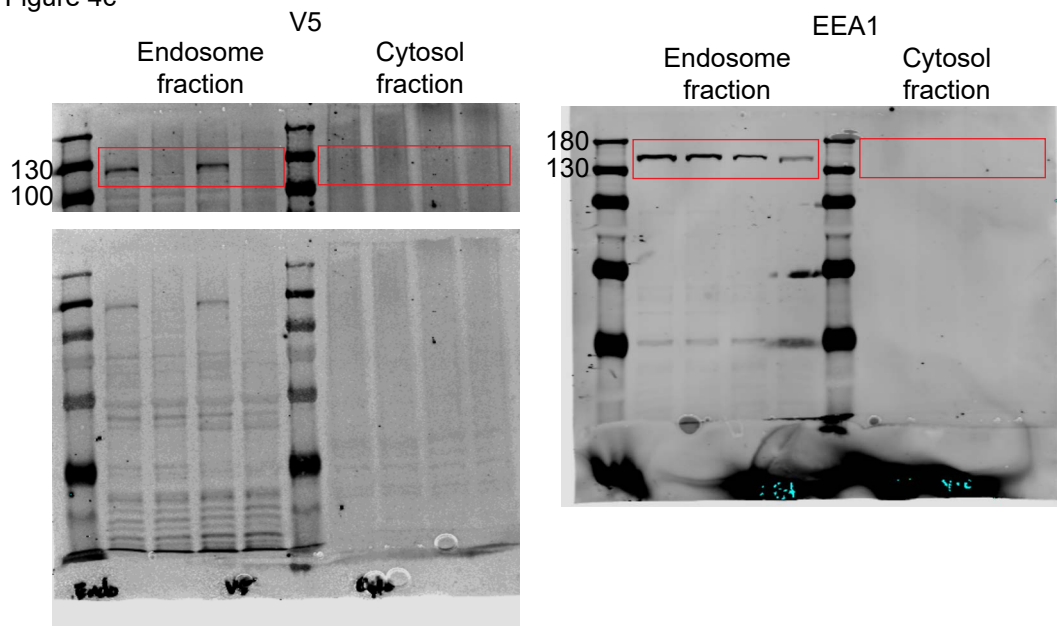

Figure 5a

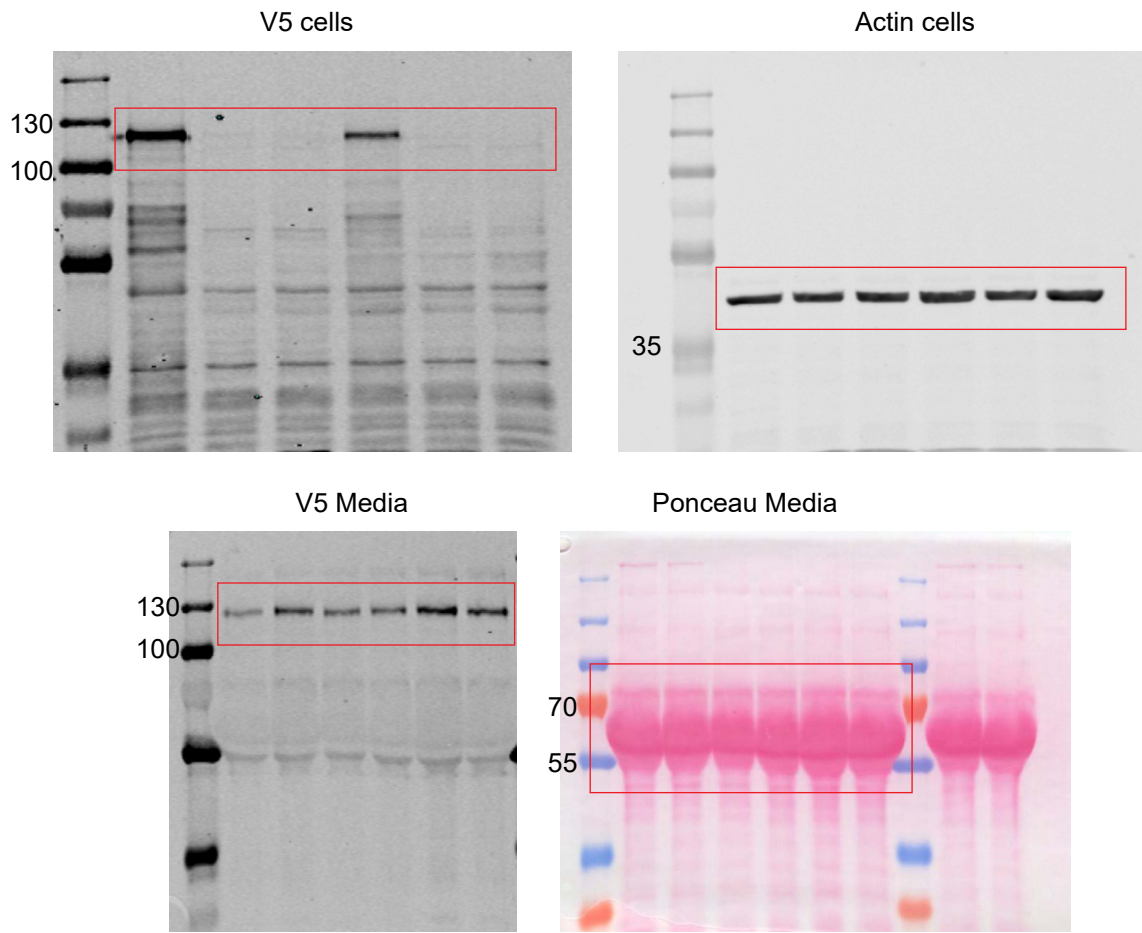

Figure 5e

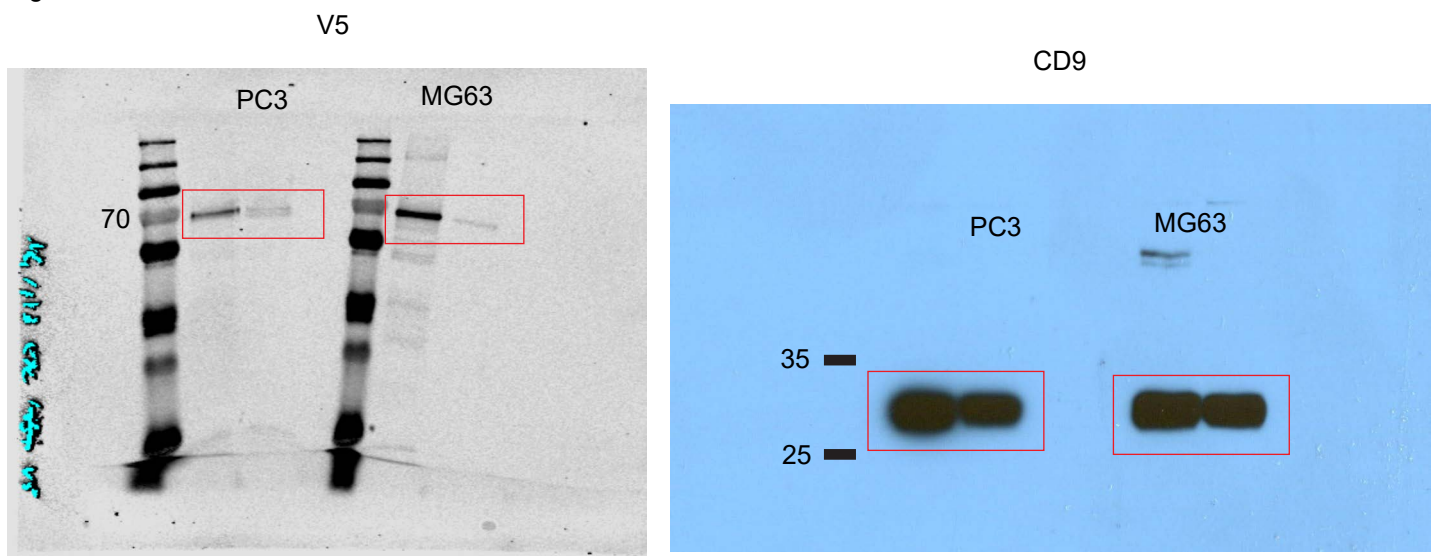

Supplement: 41598_2022_7025_MOESM1_ESM.pdf [file 41598_2022_7025_MOESM1_ESM.pdf]
