# Supplementary material for: Internalization and trafficking of CSPG-bound recombinant VAR2CSA lectins in cancer cells
Source: PubMed Central journal article supplement (PMC8866492; doi:10.1038/s41598-022-07025-6), 2022-02-23
Supplement: 41598_2022_7025_MOESM2_ESM.pdf [file 41598_2022_7025_MOESM2_ESM.pdf]

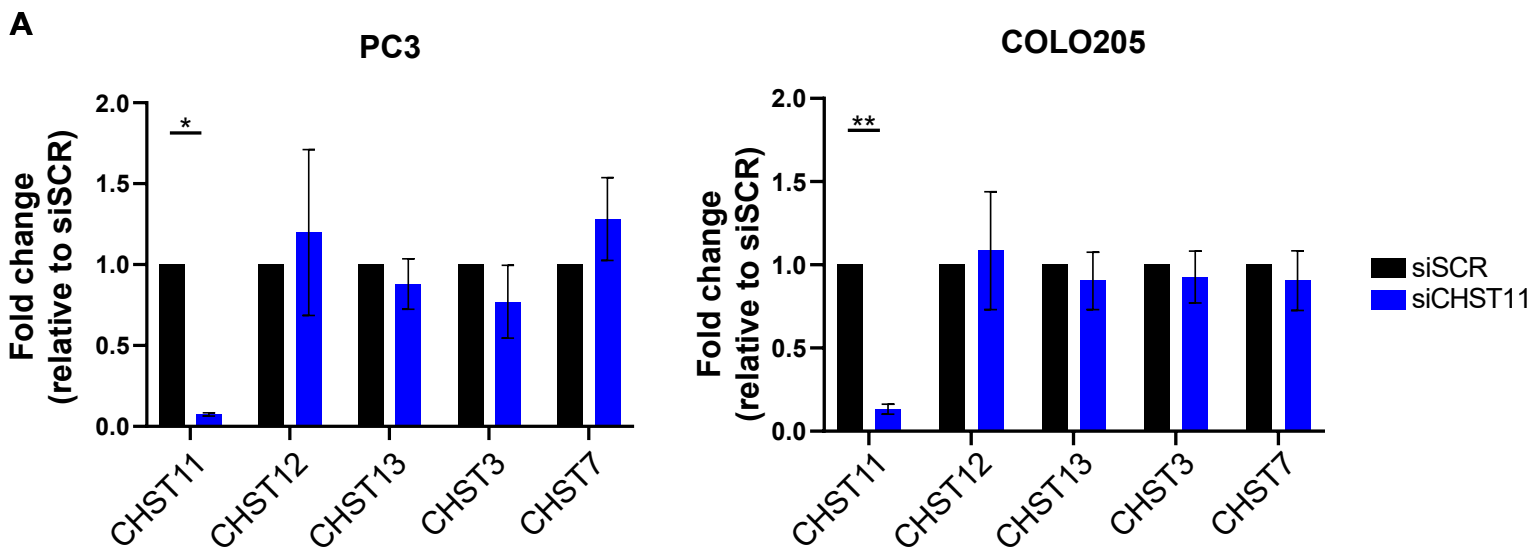

**Figure S2a.** Sulfotransferase expression after CHST11 knockdown. qPCR for sulfotransferases following siCHST11 in Fig 2g, 2h, and 2i. mRNA levels were normalized to GapDH. Data represent mean±SEM of three independent biological replicates. \* =  $p < 0.05$ , \*\* =  $p < 0.01$

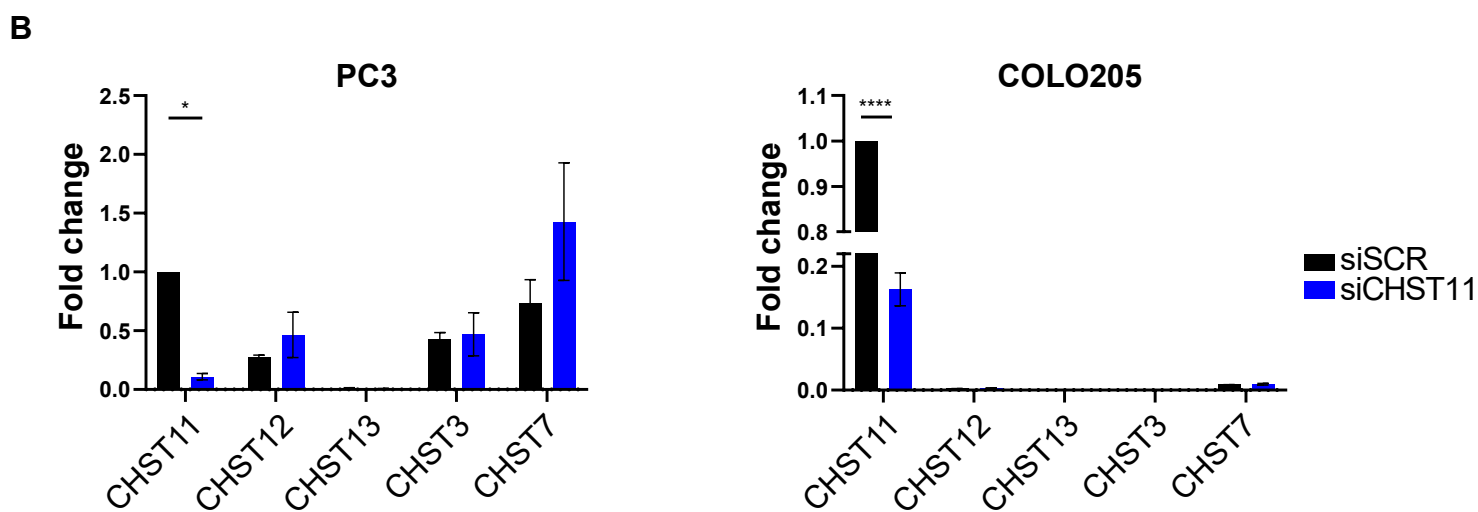

|        | siSCR |       |       | siCHST11 |       |       |
|--------|-------|-------|-------|----------|-------|-------|
|        | R1    | R2    | R3    | R1       | R2    | R3    |
| CHST11 | 1.000 | 1.000 | 1.000 | 0.055    | 0.142 | 0.129 |
| CHST12 | 0.308 | 0.270 | 0.244 | 0.131    | 0.463 | 0.799 |
| CHST13 | 0.022 | 0.002 | 0.001 | 0.012    | 0.004 | 0.002 |
| CHST3  | 0.533 | 0.409 | 0.336 | 0.214    | 0.826 | 0.372 |
| CHST7  | 0.482 | 0.608 | 1.124 | 0.432    | 1.840 | 2.013 |

|        | siSCR     |           |           | siCHST11  |           |           |
|--------|-----------|-----------|-----------|-----------|-----------|-----------|
|        | R1        | R2        | R3        | R1        | R2        | R3        |
| CHST11 | 1.0000000 | 1.0000000 | 1.0000000 | 0.1546271 | 0.2124370 | 0.1215539 |
| CHST12 | 0.0017464 | 0.0028186 | 0.0023466 | 0.0032802 | 0.0040183 | 0.0014632 |
| CHST13 | 0.0009491 | 0.0002488 | 0.0000871 | 0.0008298 | 0.0002039 | 0.0001659 |
| CHST3  | 0.0005376 | 0.0000527 | 0.0002358 | 0.0006832 | 0.0000653 | 0.0001336 |
| CHST7  | 0.0089436 | 0.0075028 | 0.0087161 | 0.0120438 | 0.0086750 | 0.0074009 |

**Figure S2b.** Sulfotransferase expression following siCHST11 in PC3 and COLO205 cells. All genes were normalized to CHST11 of siSCR with respect to each cell line. Raw values of three biological replicates are provided in tables below each graph. Data represent mean±SEM of three independent biological replicates. \* =  $p < 0.05$ , \*\*\*\* =  $p < 0.0001$

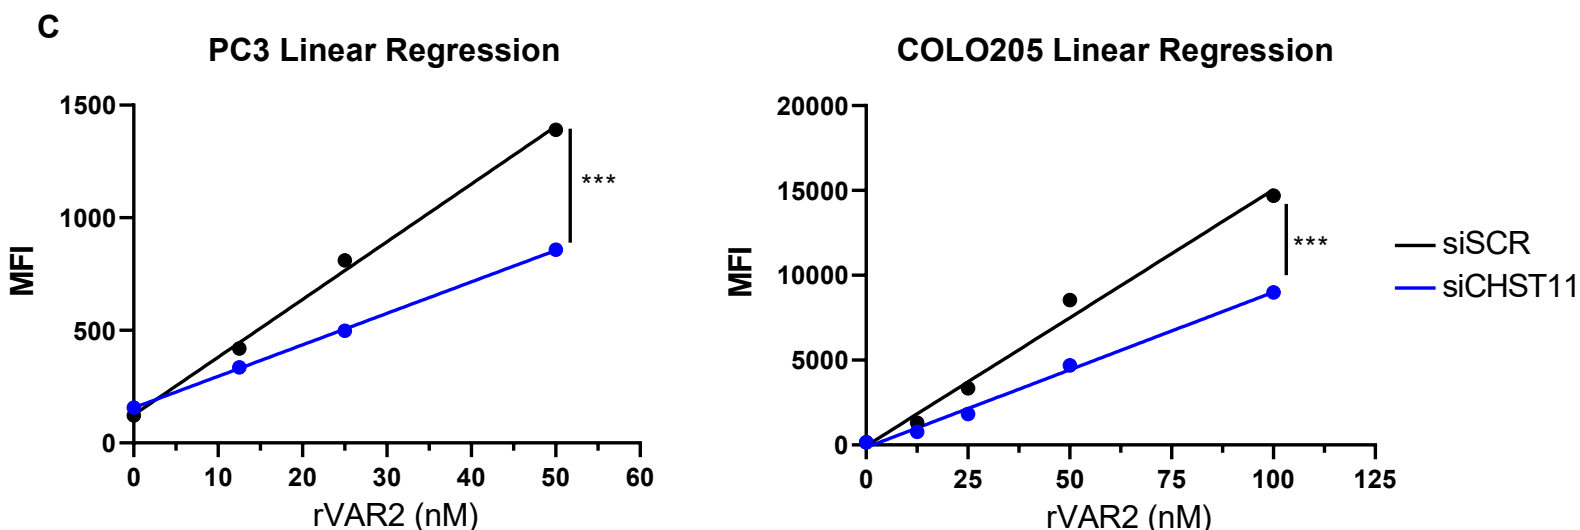

**Figure S2c.** Linear regression analysis of rVAR2 binding to PC3 and COLO205 cells after CHST11 RNAi of Fig. 2h. \*\*\* =  $p \leq 0.001$
